# Supplementary material for: A pipeline for identifying guide RNA sequences that promote RNA editing of nonsense mutations that cause inherited retinal diseases
Source: PubMed Central journal article supplement — Mol Ther Nucleic Acids. 2024 Jan 30;35(1):102130. doi: 10.1016/j.omtn.2024.102130 (PMC10875612; doi:10.1016/j.omtn.2024.102130), 2024-01-30
Supplement: mmc1.pdf [file mmc1.pdf]

**Supplemental information**

**A pipeline for identifying guide RNA sequences  
that promote RNA editing of nonsense mutations  
that cause inherited retinal diseases**

**Nina Schneider, Ricky Steinberg, Amit Ben-David, Johanna Valensi, Galit David-Kadoch, Zohar Rosenwasser, Eyal Banin, Erez Y. Levanon, Dror Sharon, and Shay Ben-Aroya**

## SUPPLEMENTAL METHODS

**A. GAPDH 3' UTR insert:** The 161 bp insert containing a portion of the 3' UTR of GAPDH, cloned into a reading frame in the pMcherry-EGFP reporter plasmid in which the editing of the target adenosine (blue) prevents translation termination, with a single base change of T>C (yellow) 8 bp downstream of the target adenosine to prevent a second stop codon in the reading frame.

```
CCCAGCAAGAGCACAAGAGGAAGAGAGAGACCCTCACTGCTGGGGAGTCCCTGCCA  
CACTCAGTCCCCCACCACACTGAATCTCCCCTCCTCACAGTTGCCATGTAAGACCCCT  
CGAAGAGGGGAGGGGCCTAGGGAGCCGCACCTTGTCATGTACCATCAG
```

A- Target adenosine

C- T>C modification for prevention of stop codon

**B. Chemically modified 73-mer gRNA development by the Stafforst group (1) used to edit a target adenosine in the 3' UTR of GAPDH cloned into the reported plasmid.**

Key: (N)=RNA base, [N]=2'-OMe RNA base, \*=Phosphorothioate linkage

Sequence for ssRNA (5'→3'):

```
[G*][G*][U](G)[U][C](GAGAAGAGGAGAA)[C](AA)[U](A)[U](G)[C][U](AAA)[U](G)[UU]  
(G)[UUCUC](G)[UCUCCUC](G A)[C](A) [CCAGGGGU] (CCA) [CAUG][G*][C*][A*]  
[A*][C]
```

1. Merkle, T., Merz, S., Reautschnig, P., Blaha, A., Li, Q., Vogel, P., Wettengel, J., Li, J.B. and Stafforst, T. (2019) Precise RNA editing by recruiting endogenous ADARs with antisense oligonucleotides. *Nat. Biotechnol.*, **37**, 133–138.

**SUPPLEMENTAL TABLES:**

Table S1-Yeast strains+plasmids.

| YSB ID | Name                                                                  | BSB ID | Plasmid A                | BSB ID | Plasmid B                                  |
|--------|-----------------------------------------------------------------------|--------|--------------------------|--------|--------------------------------------------|
| 2907   | pYEST-DEST52-hADAR2:LEU2 +FAM161A-R523W-URA3-BamHI:HIS3               | 641    | pYEST-DEST52-hADAR2:LEU2 | 706    | FAM161A-R523W-URA3-BamHI:HIS3              |
| 2911   | pYEST-DEST52-hADAR2:LEU2 + TRPM1-K294W-URA3-BamHI:HIS3                | 641    | pYEST-DEST52-hADAR2:LEU2 | 708    | TRPM1-K294W-URA3-BamHI:HIS3                |
| 2988   | pYEST-DEST52-hADAR2:LEU2 +FAM161A-p.R523*- ura3-31nt-GR(tail):HIS3    | 641    | pYEST-DEST52-hADAR2:LEU2 | 731    | FAM161A-p.R523*- ura3-31nt-GR(tail):HIS3   |
| 2989   | pRS315::LEU2 +FAM161A-p.R523*- ura3-31nt-GR(tail):HIS3                | 61     | pRS315::LEU2             | 731    | FAM161A-p.R523*- ura3-31nt-GR(tail):HIS3   |
| 2990   | pYEST-DEST52-hADAR2:LEU2 +TRPM1-p.K294*-ura3-30nt-GR(tail):HIS3       | 641    | pYEST-DEST52-hADAR2:LEU2 | 732    | TRPM1-p.K294*-ura3-30nt-GR(tail):HIS3      |
| 2991   | pRS315::LEU2 +TRPM1-p.K294*-ura3-30nt-GR(tail):HIS3                   | 61     | pRS315::LEU2             | 732    | TRPM1-p.K294*-ura3-30nt-GR(tail):HIS3      |
| 2992   | pYEST-DEST52-hADAR2:LEU2 + KIZ-p.R76*-ura3-60nt(tail):HIS3            | 641    | pYEST-DEST52-hADAR2:LEU2 | 727    | KIZ-p.R76*-ura3-60nt(tail):HIS3            |
| 2993   | pRS315:LEU2 + KIZ-p.R76*-ura3-60nt(tail):HIS3                         | 61     | pRS315:LEU2              | 727    | KIZ-p.R76*-ura3-60nt(tail):HIS3            |
| 2994   | pYEST-DEST52-hADAR2:LEU2 +TRPM1-p.K294*-ura3 60nt(tail):HIS3          | 641    | pYEST-DEST52-hADAR2:LEU2 | 728    | TRPM1-p.K294*-ura3-60nt(tail):HIS3         |
| 2995   | pRS315::LEU2 +TRPM1-p.K294*-ura3-60nt (tail):HIS3                     | 61     | pRS315::LEU2             | 728    | TRPM1-p.K294*-ura3-60nt(tail):HIS3         |
| 3003   | pYEST-DEST52-hADAR2:LEU2 +FAM161A-p.R523*- ura3-60nt(tail):HIS3       | 641    | pYEST-DEST52-hADAR2:LEU2 | 736    | FAM161A-p.R523*- ura3-60nt(tail):HIS3      |
| 3004   | pRS315::LEU2 +FAM161A-p.R523*- ura3-60nt(tail):HIS3                   | 61     | pRS315::LEU2             | 736    | FAM161A-p.R523*- ura3-60nt(tail):HIS3      |
| 3005   | pYEST-DEST52-hADAR2:LEU2 + KIZ-R76W-URA3-BamHI:HIS3                   | 641    | pYEST-DEST52-hADAR2:LEU2 | 704    | KIZ-R76W-URA3-BamHI:HIS3                   |
| 3054   | pYEST-DEST52-hADAR2:LEU2 + KIZ-p.R76*-ura3-30nt-GR(tail):HIS3         | 641    | pYEST-DEST52-hADAR2:LEU2 | 738    | KIZ-p.R76*-ura3-30nt-GR(tail):HIS3         |
| 3055   | pRS315::LEU2 + KIZ-p.R76*-ura3-30nt-GR:HIS3                           | 61     | pRS315::LEU2             | 738    | KIZ-p.R76*-ura3-30nt-GR(tail):HIS3         |
| 3069   | pYEST-DEST52-hADAR2:LEU2 + USH2A-p.W3955*-ura3-30nt-GR(tail):HIS3     | 641    | pYEST-DEST52-hADAR2:LEU2 | 744    | USH2A-p.W3955*-ura3-30nt-GR(tail):HIS3     |
| 3070   | pRS315::LEU2 + USH2A-p.W3955*-ura3-30nt-GR(tail):HIS3                 | 61     | pRS315::LEU2             | 744    | USH2A-p.W3955*-ura3-30nt-GR(tail):HIS3     |
| 3071   | pYEST-DEST52-hADAR2:LEU2 + USH2A-p.W3955*-ura3-60nt:HIS3              | 641    | pYEST-DEST52-hADAR2:LEU2 | 745    | USH2A-p.W3955*-ura3-60nt:HIS3              |
| 3072   | pRS315::LEU2 + USH2A-p.W3955*-ura3-60nt:HIS3                          | 61     | pRS315::LEU2             | 745    | USH2A-p.W3955*-ura3-60nt:HIS3              |
| 3073   | pYEST-DEST52-hADAR2:LEU2 + USH2A-W3955W-URA3:HIS3                     | 641    | pYEST-DEST52-hADAR2:LEU2 | 741    | USH2A-W3955W-URA3:HIS3                     |
| 3097   | pYEST-DEST52-hADAR2:LEU2 + KIZ-p.R76*-ura3-60nt mismatches(tail):HIS3 | 641    | pYEST-DEST52-hADAR2:LEU2 | 747    | KIZ-p.R76*-ura3-60nt mismatches(tail):HIS3 |
| 3098   | pRS315::LUE2 + KIZ-p.R76*-ura3-60nt mismatches(tail):HIS3             | 61     | pRS315::LUE2             | 747    | KIZ-p.R76*-ura3-60nt mismatches(tail):HIS3 |

|      |                                                                             |     |                          |     |                                                   |
|------|-----------------------------------------------------------------------------|-----|--------------------------|-----|---------------------------------------------------|
| 3099 | pYEST-DEST52-hADAR2:LEU2 +FAM161A-p.R523*- ura3-60nt mismatches (tail):HIS3 | 641 | pYEST-DEST52-hADAR2:LEU2 | 748 | FAM161A-p.R523*- ura3-60nt mismatches (tail):HIS3 |
| 3100 | pRS315::LEU2 +FAM161A-p.R523*- ura3-60nt mismatches (tail):HIS3             | 61  | pRS315::LEU2             | 748 | FAM161A-p.R523*- ura3-60nt mismatches (tail):HIS3 |
| 3101 | pYEST-DEST52-hADAR2:LEU2 +TRPM1-p.K294*-ura3 60nt mismatches(tail):HIS3     | 641 | pYEST-DEST52-hADAR2:LEU2 | 749 | TRPM1-p.K294*-ura3 60nt mismatches(tail):HIS3     |
| 3102 | pRS315::LEU2 +TRPM1-p.K294*-ura3-60nt mismatches(tail):HIS3                 | 61  | pRS315::LEU2             | 749 | TRPM1-p.K294*-ura3-60nt mismatches(tail):HIS3     |

Table S2-Target and Tails' sequence.

| Name                                                                  | Sequence                                                                                                                                                                                                                                                                     |
|-----------------------------------------------------------------------|------------------------------------------------------------------------------------------------------------------------------------------------------------------------------------------------------------------------------------------------------------------------------|
| FAM161A-R523W                                                         | ATGAAATTGCCAGTATTCTTAACCCAACCTGCACAGAACAAAAACCTGCAGGAAACGAAGATAAATC <b>atgCCTGTGCCTTGTA</b> ACTGCAACCCTCCCGTGCCACGG<br>TATCTTCCAGAGGATG <b>GGAACAAGCCGTAAGGAGATCACTTGAGGAAAAGAAAATGTTGGAAGAA</b> tcgaaagctacatataaggaacgtgctgctactcatcctagtctgtgct<br>tgccaagctatttaata      |
| FAM161A-p.R523*                                                       | ATGAAATTGCCAGTATTCTTAACCCAACCTGCACAGAACAAAAACCTGCAGGAAACGAAGATAAATC <b>atgCCTGTGCCTTGTA</b> ACTGCAACCCTCCCGTGCCACGG<br>TATCTTCCAGAGGATG <b>AGAACAAGCCGTAAGGAGATCACTTGAGGAAAAGAAAATGTTGGAAGAA</b> tcgaaagctacatataaggaacgtgctgctactcatcctagtctgtgct<br>gccaagctatttaata       |
| The 31nt+GR gRNA<br>to the target<br>FAM161A-p.R523*                  | gttacagaaaagcaggctggaagcatattgagaagatgcgccagcaaaactaa <b>CTTACGGCTTGTTCC</b> CATCCTCTGGAAGATAGGGTGAATAGTATAACAATATGCTAAATGT<br>TGTTATAGTATCCACCTAAAACCTGTATTATAAGTAAATGCATGTATACTAACTCACAAA                                                                                  |
| The 60nt gRNA to the<br>target FAM161A-<br>p.R523*                    | caaaggaaggatgctaaggtagagggtgaacgttacagaaaagcaggctggaagcatattgagaagatgcgccagcaaaactaa <b>TCTCAAGTGATCTCCTTACGGCTTGTTCC</b> CATCC<br><b>TCTGGAAGATACCGTGGGCACGGGA</b> AAAACCTGTATTATAAGTAAATGCATGTATACTAACTCACAAATTAGAGCTCAATTTAATTATATCAGTTATTACCCGGGAAT<br>CTCGGTCGTAATGATT  |
| The 60nt gRNA with<br>mismatches to the<br>target FAM161A-<br>p.R523* | gaaaagcaggctggaagcatattgagaagatgcgccagcaaaactaa <b>TCTCAAGTGATCTCCTTAC</b> GaCaaGTgCcCAaCgTgTgC <b>AAGATACCGTGGGCACGGGA</b> AAAACCT<br>GTATTATAAGTAAATGCATGTATACTAACTCACAAATTAGAGC                                                                                           |
| KIZ-R76W                                                              | TCTTAACCCAACCTGCACAGAACAAAAACCTGCAGGAAACGAAGATAAATC <b>atgAAGAATTATCTGAAGGAAATATGTGAATCTGAAAAGAAGGCTCATACTTG</b> GA<br><b>ACCAAGAATATTTAAAGCGATTTGAGCGTGTCCAAGCTCATGTTGTACAC</b> tcgaaagctacatataaggaacgtgctgctactcatcctagtctgtgct                                           |
| KIZ-p.R76*                                                            | TCTTAACCCAACCTGCACAGAACAAAAACCTGCAGGAAACGAAGATAAATC <b>atgAAGAATTATCTGAAGGAAATATGTGAATCTGAAAAGAAGGCTCATACTTG</b> AA<br><b>ACCAAGAATATTTAAAGCGATTTGAGCGTGTCCAAGCTCATGTTGTACAC</b> tcgaaagctacatataaggaacgtgctgctactcatcctagtctgtgct                                           |
| The 30nt+GR gRNA<br>to the target KIZ-<br>p.R76*                      | ttacagaaaagcaggctggaagcatattgagaagatgcgccagcaaaactaa <b>AAATATTCTTGTTCC</b> CAAGTATGAGCCTTCGGGTGAATAGTATAACAATATGCTAAATGTTG<br>TTATAGTATCCACCTAAAACCTGTATTATAAGTAAATGCATGTATACTAACTCACAAA                                                                                    |
| The 60nt gRNA to the<br>target KIZ-p.R76*                             | caaaggaaggatgctaaggtagagggtgaacgttacagaaaagcaggctggaagcatattgagaagatgcgccagcaaaactaa <b>CGCTCAAATCGCTTTAAATATTCTTGTTCC</b> CAAGT<br><b>ATGAGCCTTCTTTTCAGATTCACAT</b> AAAACCTGTATTATAAGTAAATGCATGTATACTAACTCACAAATTAGAGCTCAATTTAATTATATCAGTTATTACCCGGGAATCT<br>CGGTCGTAATGATT |
| The 60nt gRNA with<br>mismatches to the<br>target KIZ-p.R76*          | gagggtgaacgttacagaaaagcaggctggaagcatattgagaagatgcgccagcaaaactaa <b>CGCTCAAATCGCTTTAAATATgCacGccacCA</b> taccTcAg <b>CCTTCTTTTCAGATTC</b> A<br><b>CAT</b> AAAACCTGTATTATAAGTAAATGCATGTATACTAACTCACAAATTAG                                                                     |
| TRPM1-K294W                                                           | ATGAAATTGCCAGTATTCTTAACCCAACCTGCACAGAACAAAAACCTGCAGGAAACGAAGATAAATC <b>atgGTGATTTGTGATGGCAGCGGACGTGCCTCGGACATC</b><br><b>CTGTCCTTTGCGCACTGGTACTGTGAAGAAGGCGGAATAATAAATGAGTCCCTCAGGGAGCAGCTT</b> tcgaaagctacatataaggaacgtgctgctactcatcctagtctgtgct<br>gccaagctatttaata        |
| TRPM1-p.K294*                                                         | ATGAAATTGCCAGTATTCTTAACCCAACCTGCACAGAACAAAAACCTGCAGGAAACGAAGATAAATC <b>atgGTGATTTGTGATGGCAGCGGACGTGCCTCGGACATC</b><br><b>CTGTCCTTTGCGCACTAGTACTGTGAAGAAGGCGGAATAATAAATGAGTCCCTCAGGGAGCAGCTT</b> tcgaaagctacatataaggaacgtgctgctactcatcctagtctgtgct<br>gccaagctatttaata        |

|                                                            |                                                                                                                                                                                                                                                                                                                                                |
|------------------------------------------------------------|------------------------------------------------------------------------------------------------------------------------------------------------------------------------------------------------------------------------------------------------------------------------------------------------------------------------------------------------|
| The 30nt+GR gRNA to the target TRPM1-p.K294*               | gaaaagcaggctgggaagcatattgagaagatcgggccagcaaaactaa <b>CTTCTTCACAGTACc</b> AGTGCGCAAAGGACAGGGTGGGAATAGTATAACAATATGCTAAATGTTGTT<br><b>ATAGTATCCCACCT</b> AAAAGTATTATAAGTAAATGCATGTATACTAAACTCACAAA                                                                                                                                                |
| The 60nt gRNA to the target TRPM1-p.K294*                  | cgttacagaaaagcaggctgggaagcatattgagaagatcgggccagcaaaactaa <b>CATTTATTATTCCGCCTTCTTCACAGTACc</b> AGTGCGCAAAGGACAGGATGTCCGAGGCAC<br>AAAAGTATTATAAGTAAATGCATGTATACTAAACTCACAAATTAGAGC                                                                                                                                                              |
| The 60nt gRNA with mismatches to the target TRPM1-p.K294*  | gaaaagcaggctgggaagcatattgagaagatcgggccagcaaaactaa <b>CATTTATTATTCCGCCTTCTTgAaAcTgCcAcTatGCgAAGGACAGGATGTCCGAGGCAC</b> AAAAGTGT<br>ATTATAAGTAAATGCATGTATACTAAACTCACAAATTAGAGC                                                                                                                                                                   |
| USH2A-W3955W                                               | ATATATACGCATATGTGGTGTGAAGAAACATGAAATTGCCAGTATTCTTAACCCAAGTGCACAGAACAAAAACCTGCAGGAAACGAAGATAAATC <b>atgGACGAATA</b><br><b>TCGGGTCAGAGCCTGTAACCCAAGGGTTCAGTGGAGAGTCTGT</b> <b>G</b> GT <b>CATTAAACACAAACTCTGGAAGCTCCACCTCAAGATTTCCAGCTCCT</b> tcgaaagctacata<br>taaggaacgtgctgctactcatcctagtctgttctgccaagctatttaatatcatgcacgaaaagcaaaactgtgtgctt |
| USH2A-p.W3955*                                             | ATATATACGCATATGTGGTGTGAAGAAACATGAAATTGCCAGTATTCTTAACCCAAGTGCACAGAACAAAAACCTGCAGGAAACGAAGATAAATC <b>atgGACGAATA</b><br><b>TCGGGTCAGAGCCTGTAACCCAAGGGTTCAGTGGAGAGTCTGT</b> <b>A</b> GT <b>CATTAAACACAAACTCTGGAAGCTCCACCTCAAGATTTCCAGCTCCT</b> tcgaaagctacata<br>taaggaacgtgctgctactcatcctagtctgttctgccaagctatttaatatcatgcacgaaaagcaaaactgtgtgctt |
| The 30nt+GR gRNA to the target USH2A-p.W3955*              | aaaggaaggatgctaaggtagagggtgaacgttacagaaaagcaggctgggaagcatattgagaagatcgggccagcaaaactaa <b>GTTTGTGTTAATGACcACAGACTCTCCACTGGGTG</b><br><b>GAATAGTATAACAATATGCTAAATGTTGTTATAGTATCCCACCT</b> AAAAGTATTATAAGTAAATGCATGTATACTAAACTCACAAATTAGAGCTTCAATTTAATTATATC<br>AGTTATTACCCGGAATCTCG                                                              |
| The 60nt gRNA to the target USH2A-p.W3955*                 | gaaaagcaggctgggaagcatattgagaagatcgggccagcaaaactaa <b>GTGGAGCTTCAGAGTTTGTGTTAATGACcACAGACTCTCCACTGAACCCTTGGAGTTAC</b> AAAAC<br>TGTATTATAAGTAAATGCATGTATACTAAACTCACAAATTAGAGC                                                                                                                                                                    |
| The 60nt gRNA with mismatches to the target USH2A-p.W3955* | gaaaagcaggctgggaagcatattgagaagatcgggccagcaaaactaa <b>GTGGAGCTTCAGAGTTTGTGTAACGGCCcAGCGTCGCTCCACTGAACCCTTGGAGTTAC</b> AAAAC<br>TGTATTATAAGTAAATGCATGTATACTAAACTCACAAATTAGAGC                                                                                                                                                                    |

Target gene - blue  
Reverse complement "tails" - yellow  
Tail with "recruitment element" (GR) - green  
The position of targeted A - red  
Plasmid homology ends - purple

Table S3-NGS primers.

| OSB ID | Name                                                                                                            | Sequences                                                            |
|--------|-----------------------------------------------------------------------------------------------------------------|----------------------------------------------------------------------|
| 2795   | Forward primer on the 60nt gRNA to the target FAM161A-p.R523* + sp p5 for deepseq                               | TCGTCGGCAGCGTCAGATGTGTATAAGAGACAGatg <b>CCTGTGCCTTGTAAC</b>          |
| 2796   | Forward primer on the 60nt gRNA to the target TRPM1-p.K294* + sp p5 for deepseq                                 | TCGTCGGCAGCGTCAGATGTGTATAAGAGACAGatg <b>GTGATTTGTGATGGCA</b>         |
| 2797   | Forward primer on the 60nt gRNA to the target KIZ-p.R76* + sp p5 for deepseq                                    | TCGTCGGCAGCGTCAGATGTGTATAAGAGACAGatg <b>AAGAATTATCTGAAGGAAATATGT</b> |
| 2798   | Reverse primer (for all the target) on URA3 39bp downstream to start codon + sp p7 for deepseq                  | GTCTCGTGGGCTCGGAGATGTGTATAAGAGACAGatg <b>gagtagcagcagcttc</b>        |
| 2840   | Forward primer on the 60nt gRNA to the target USH2A-p.W3955* + sp p5 for deepseq                                | TCGTCGGCAGCGTCAGATGTGTATAAGAGACAGatg <b>GACGAATATCGGGTCAGAG</b>      |
| 1202   | Forward primer on URA3 173bp upstream to the A gRNA                                                             | GAGACGCATTGGGTCAACAG                                                 |
| 502    | Reverse primer on URA3 195bp downstream to the gRNA                                                             | CGACGGCCAGTGAATTGTAA                                                 |
| 2366   | Forward primer on URA3 300bp upstream to the target                                                             | aatttcacacaggaacagctatg                                              |
| 207    | Reverse primer on URA3 263bp downstream to the target                                                           | GTCAGCAAATTTTCTGTCTTCG                                               |
| 2874   | Reverse primer for addition tail to the kiz's library with homologous to the 3' of URA3 in the BSB 704 plasmid. | GCTCTAATTTGTGAGTTTAGTATACATGCATTTACTTATAATACAGTTTT                   |
| 2875   | Forward primer for addition tail to the kiz's library with homologous to the 3' of URA3 in the BSB 704 plasmid. | gaaaagcaggctgggaagcatattgagaagatgccggccagcaaaactaa                   |

Table S4: Sequences of chemically modified gRNA

| Key: (N)=RNA base, [N]=2'-OMe RNA base, *=Phosphorothioate linkage |                                        |                                                                                                                                                                   |
|--------------------------------------------------------------------|----------------------------------------|-------------------------------------------------------------------------------------------------------------------------------------------------------------------|
| gRNA target                                                        | Type                                   | gRNA Sequence 5'-3'                                                                                                                                               |
| <b>TRPM1<br/>p.K294*</b>                                           | <b>60<br/>bases</b>                    | [C*][A*][U*](UUAUUUCCGCCUUCUUCACAGUACCAGUGCGCAAAGGACAGGAUGUCCGAG)(G*)[C*][A*][C]                                                                                  |
| <b>FAM161A<br/>p.R523*</b>                                         | <b>60<br/>bases</b>                    | [T*][C*][C*](TCAAGTGATCTCCTTACGGCTTGTTCCCATCCTCTGGAAGATACCGTGGGCAC)(G*)[G*][G*][A]                                                                                |
| <b>KIZ<br/>p.R76*</b>                                              | <b>60<br/>bases</b>                    | [C*][G*][C*](UCAAAUCGCUUUAAAUUUCUUGGUUCCAAGUAUGAGCCUUCUUUCAGAUUC)(A*)[C*][A*][U]                                                                                  |
| <b>KIZ<br/>p.R76*</b>                                              | <b>“B4”<br/>60<br/>bases</b>           | [C*][G*][C*](UGAAAUCGCUUUAAAUUUCUUGGUUCCAAGUAUGUUCUUCUUUCAGAUUC)(A*)[C*][A*][U]                                                                                   |
| <b>KIZ<br/>p.R76*</b>                                              | <b>“B12”<br/>”<br/>60<br/>bases</b>    | [C*][G*][C*](UCAAAUCGGUUCAAAUAUUCUUGGUUCCAAGUAUGUUCUUCUUUCAGAUUC)(A*)[C*][A*][U]                                                                                  |
| <b>KIZ<br/>p.R76*</b>                                              | <b>“TT”<br/>60<br/>bases</b>           | [C*][G*][C*](UCAAAUCGCUUUAAAUUUCUUGGUUCCAAGUAUGUUCUUCUUUCAGAUUC)(A*)[C*][A*][U]                                                                                   |
| <b>USH2A<br/>p.W3955*</b>                                          | <b>60<br/>bases</b>                    | [G*][U*][G*](GAGCUUCCAGAGUUUGUGUUAUGACcACAGACUCUCCACUGAACCCUUGGAG)(U*)[U*][A*][C]                                                                                 |
| <b>USH2A<br/>p.W3955*</b>                                          | <b>30<br/>bases<br/>+ GR<br/>motif</b> | [G*][U*][U*][U*][GUGUUAUGA](CCA)[CAGACUCUCCACU](GGG)[U](GGAA)[U](AG)[U](A)[U](AA)[C](AA)[U](A)[U](G)[CU](AAA)[U](G)[UU](G)[UU](A)[U](AG)[U](A)[UCC](A)[C*][C*][U] |



## SUPPLEMENTAL FIGURES:

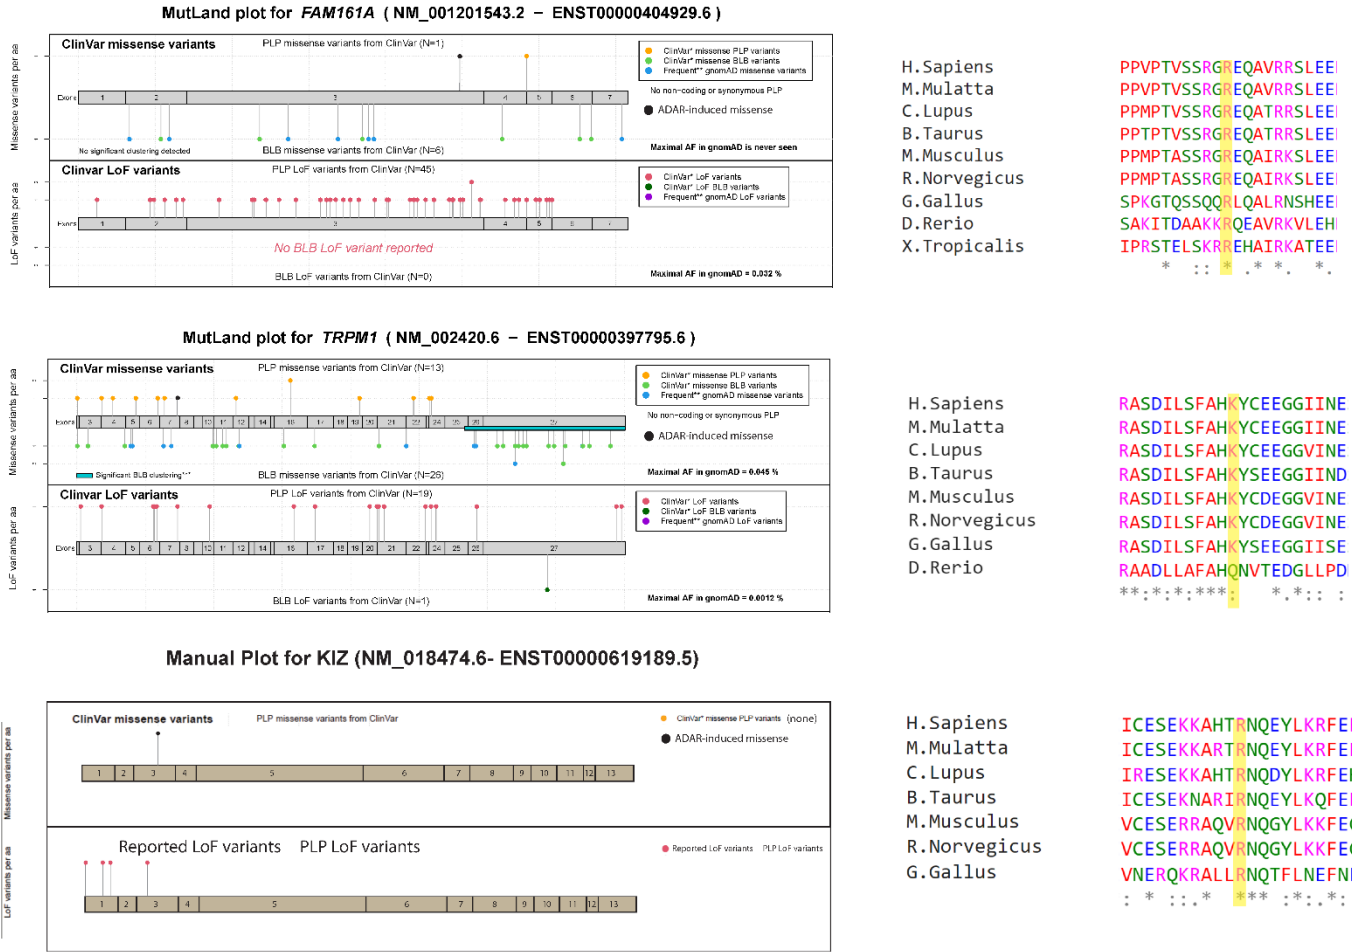

**Figure S1. MutLand analysis and conservation of mutations in three genes.** Left pane: MutLand plots for *FAM161A*, *TRPM1*, and *KIZ* (created manually due to lack of proper Annovar annotation for the *KIZ* gene) showing exonic location of pathogenic or likely pathogenic missense variants in these genes, as well as Clinvar LoF variants. The black circle was manually added to each plot to show where the ADAR-induced missense mutation would be found in each gene. Right pane: Conservation of amino acids in the regions flanking the ADAR targeted codon for each gene with the ADAR-edited amino acid highlighted in yellow



**Figure S2. Expression and editing levels of ADAR in the retina compared to various tissues.** The presented analysis is based on data retrieved from the GTEx project <sup>1</sup> and a downloaded dataset (Bio Project: PRJNA476171, only samples exhibiting MGS level of zero or one were included) used for the retinal-related data. A&B). Expression levels of hADAR2 (**A**) and hADAR1 (**B**) across different tissues. Expression levels are depicted as transcript per million (TPM). The number of samples included for each tissue is indicated at the bottom of each graph. The dashed red line represents the mean expression levels in the retina. Neuronal tissues are highlighted in red. (**C**) Editing levels of conserved editing sites across 48 tissues. Editing levels for the retina were calculated based on the above-mentioned dataset, and editing levels for the other tissues were retrieved from <sup>2</sup>. Retinal and neuronal tissue-related data are marked in red and yellow, respectively. Each dot represents the combined data from all samples derived from a given tissue.

1. GTEx Consortium (2013). The Genotype-Tissue Expression (GTEx) project. *Nat. Genet.* *45*, 580–585. 10.1038/ng.2653.
2. Gabay, O., Shoshan, Y., Kopel, E., Ben-Zvi, U., Mann, T.D., Bressler, N., Cohen-Fultheim, R., Schaffer, A.A., Roth, S.H., Tzur, Z., et al. (2022). Landscape of adenosine-to-inosine RNA recoding across human tissues. *Nat. Commun.* *13*, 1184. 10.1038/s41467-022-28841-4.

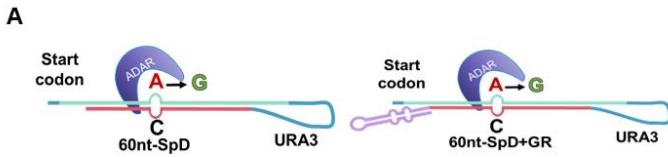

**B**

|     | hADAR1/2 | Minigene fragment with: | gRNA        |
|-----|----------|-------------------------|-------------|
| I   | +        | TGG                     | -           |
| II  | +        | Stop codon              | 60nt-SpD    |
| III | +        | Stop codon              | 60nt-SpD-GR |
| IV  | -        | Stop codon              | 60nt-SpD    |
| V   | -        | Stop codon              | 60nt-SpD-GR |

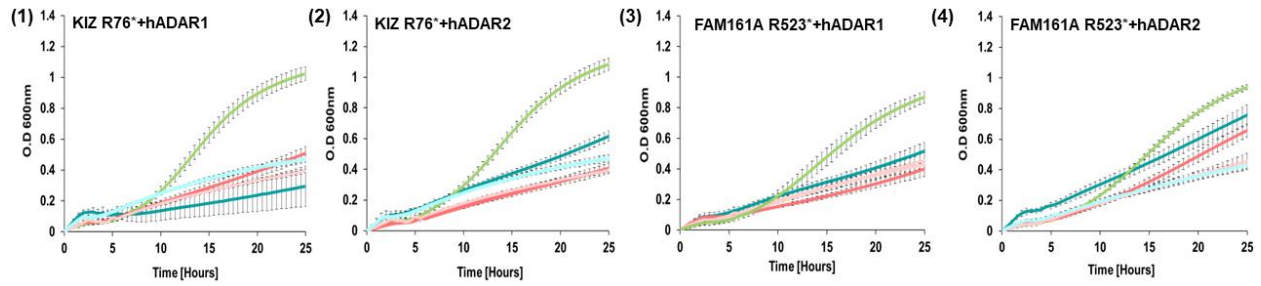

**Figure S3. No improvement in the growth of *KIZ*-p.R76\* and *FAM161A* p.R523\* mutants upon elongation of the 30nt specificity domain to 60nt.** The experiments presented here are similar to those presented in Figure 3, however in the current experiments a longer specificity domain of 60nt (60nt-SpD-GR) was used instead of 30nt-SpD-GR gRNA .

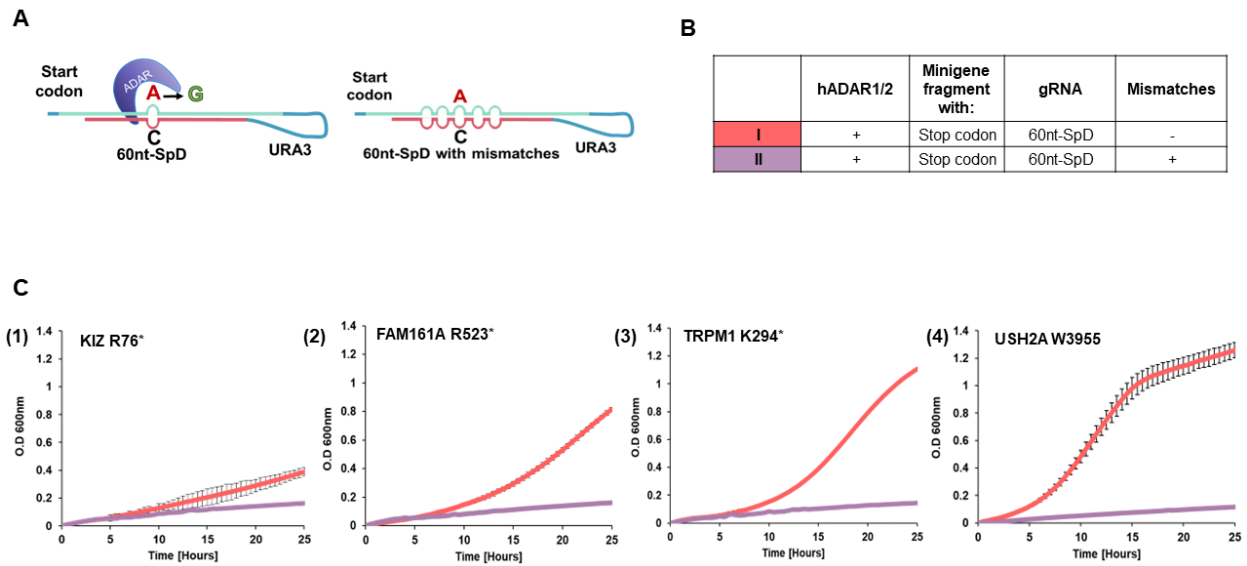

**Figure S4. hADAR2-mediated editing of selected IRD mutations depends on the dsRNA structure formed by the gRNA.** (A) Schematic representation of the dsRNA structure formed when the “tail” containing the selected gRNA sequences folds back at the RNA level on the target to form the dsRNA structure for ADAR recruitment, and of the control experiment that in addition to the A-C mismatch, carried additional mismatches around the target A. (B) A table describing the contents of the strains (denoted as I-II) tested in panels C-F. (C) Growth curves of the indicated strains were produced as described in Figure 2D.

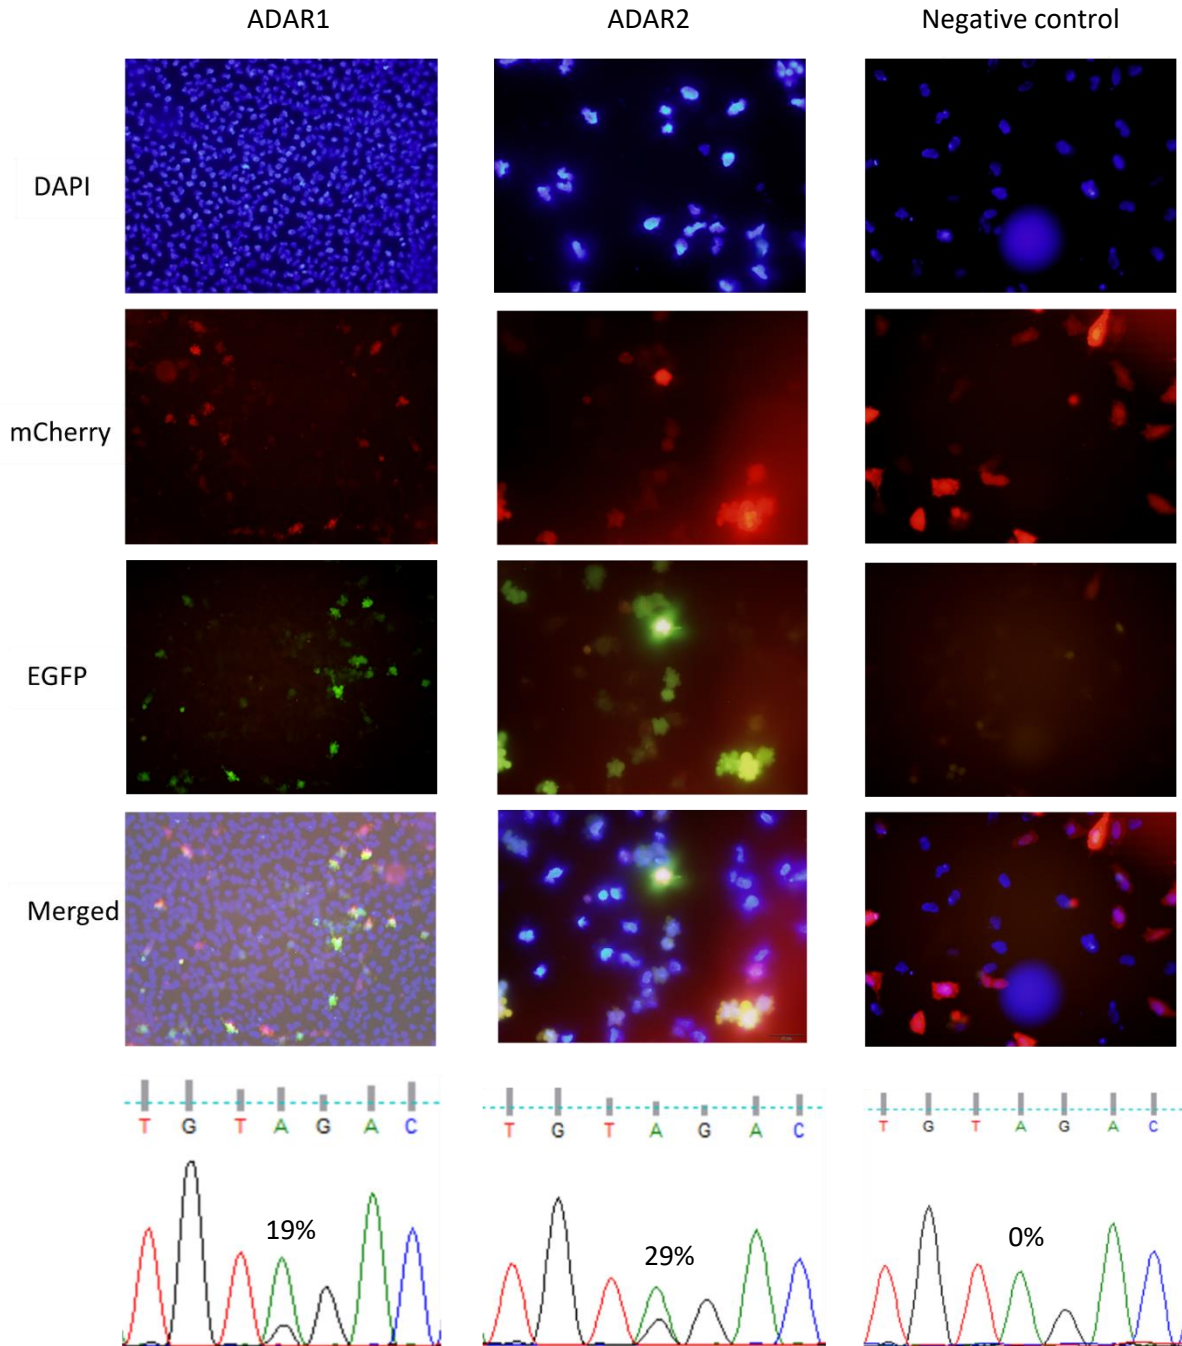

**Figure S5: Confirmation of the reporter system.** Representative images from samples of ADAR1 p.110 (ADAR1) and ADAR2 overexpressing HeLa cells transfected with both the 3'-UTR *GAPDH* nonsense mutation reporter plasmid and chemically modified gRNA (18 bp long complementarity region and a 55 bp GR motif tail) or no gRNA (negative control) at 96 hours post-seeding using fluorescent microscopy as well as representative Sanger sequences.



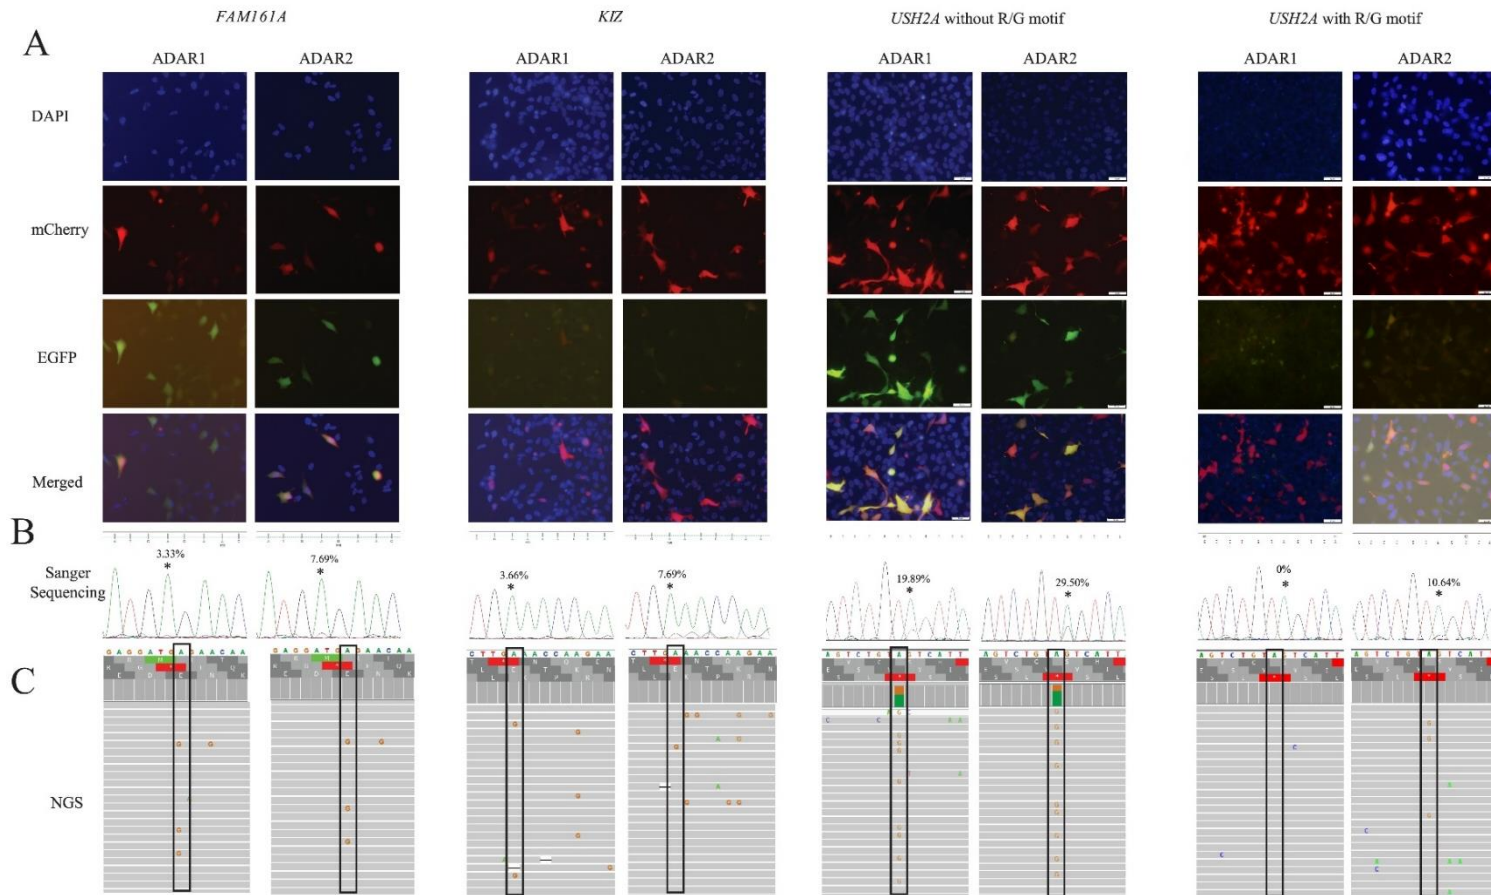

**Figure S6: RNA editing of three IRD-causing mutations.** Representative images from samples of ADAR1 p.110 (ADAR1) and ADAR2 overexpressing HeLa cells transfected with either the *FAM161A*, *KIZ*, or *USH2A* (with and without GR motif) nonsense mutation reporter plasmid and 60-mer chemically modified gRNA at 96 hours post-seeding. **(A)** Fluorescent microscopy **(B)** Sanger sequence **(C)** Next generation sequencing reads in IGV viewer

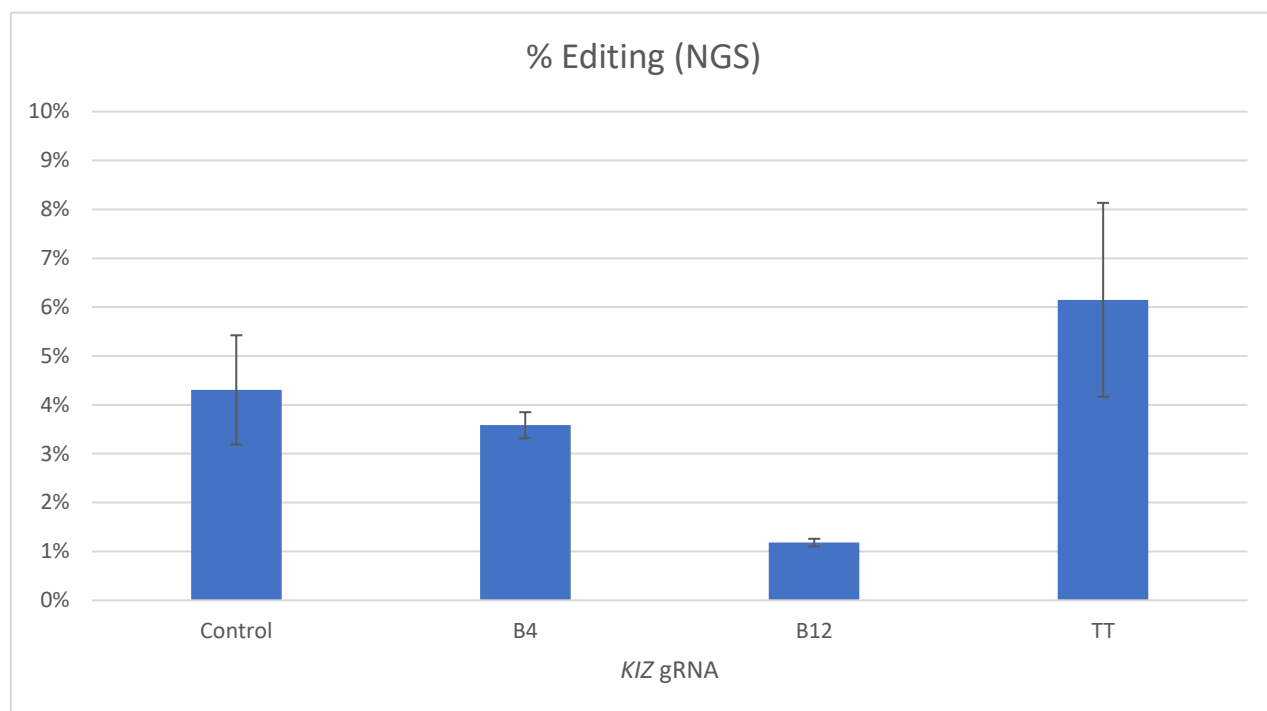

**Figure S7: Editing levels of selected gRNAs.** Editing levels of adenosine target in the *KIZ* minigene in ADAR2-expressing HeLa cells after introduction of B4, B12, or TT gRNA with multiple mismatches, corrected for background. Results are mean  $\pm$  standard error of the mean (SEM n = 3).



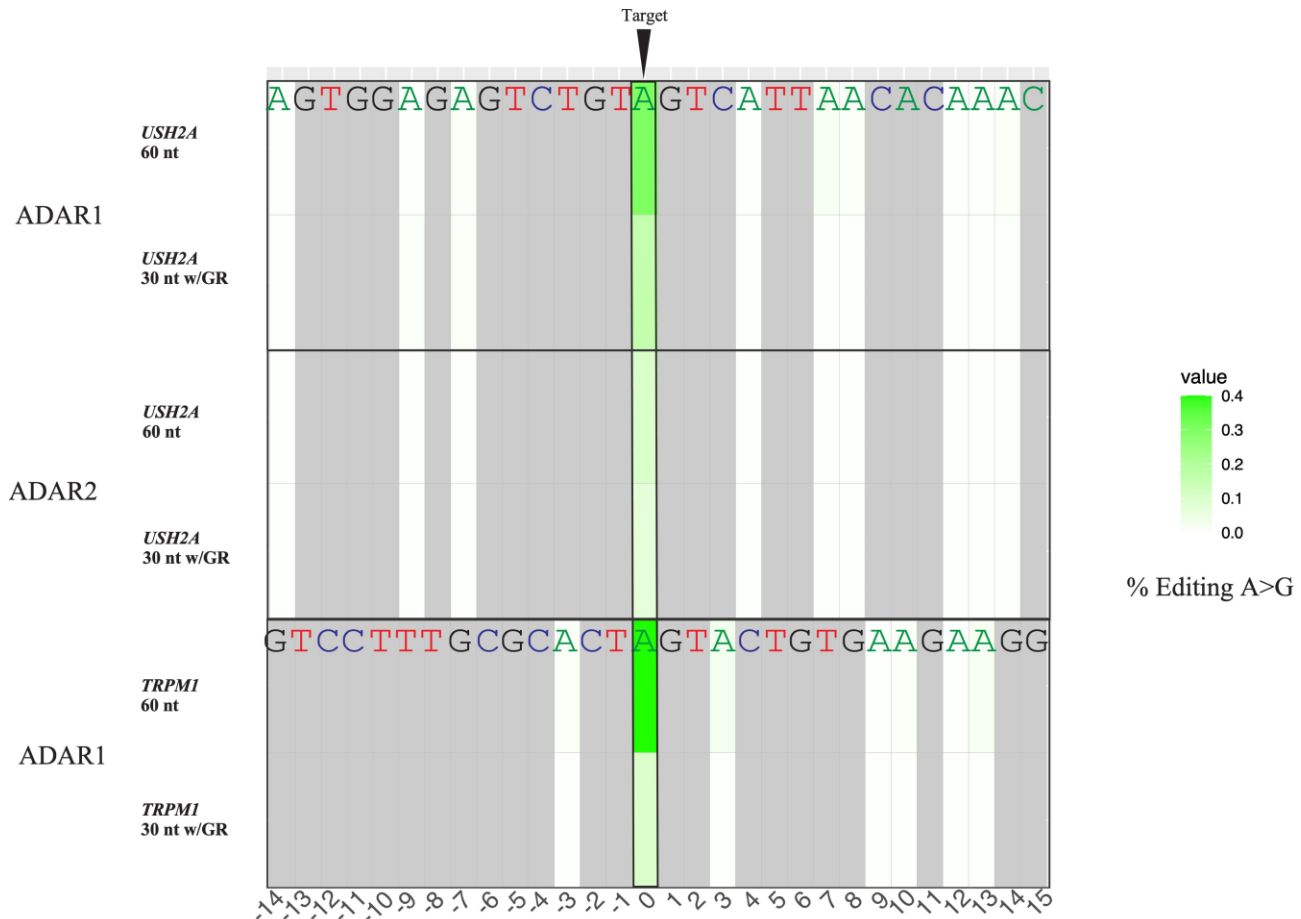

**Figure S8: Heatmap off-target analysis of three IRD-causing mutations.** Using shorter gRNAs can reduce bystander editing, but at the cost of potentially negatively impacting the target adenosine. Heatmap of average off-target and on-target editing rate for adenosines in the indicated strains. Average editing levels are shown are the result of NGS analysis (n=3). Positions below the heatmap are relative to the target adenosine (0), bases in grey are non-adenosine bases while adenosines with 0% editing are white gradually increasing to deep green in correlation with increasing editing levels.
